# Supplementary material for: Features of 5′-splice-site efficiency derived from disease-causing mutations and comparative genomics
Source: HighWire-hosted journal article supplement (doi:10.1101/gr.6859308), 2007-11-21
Supplement: suppl_1.pdf [file suppl_1.pdf]

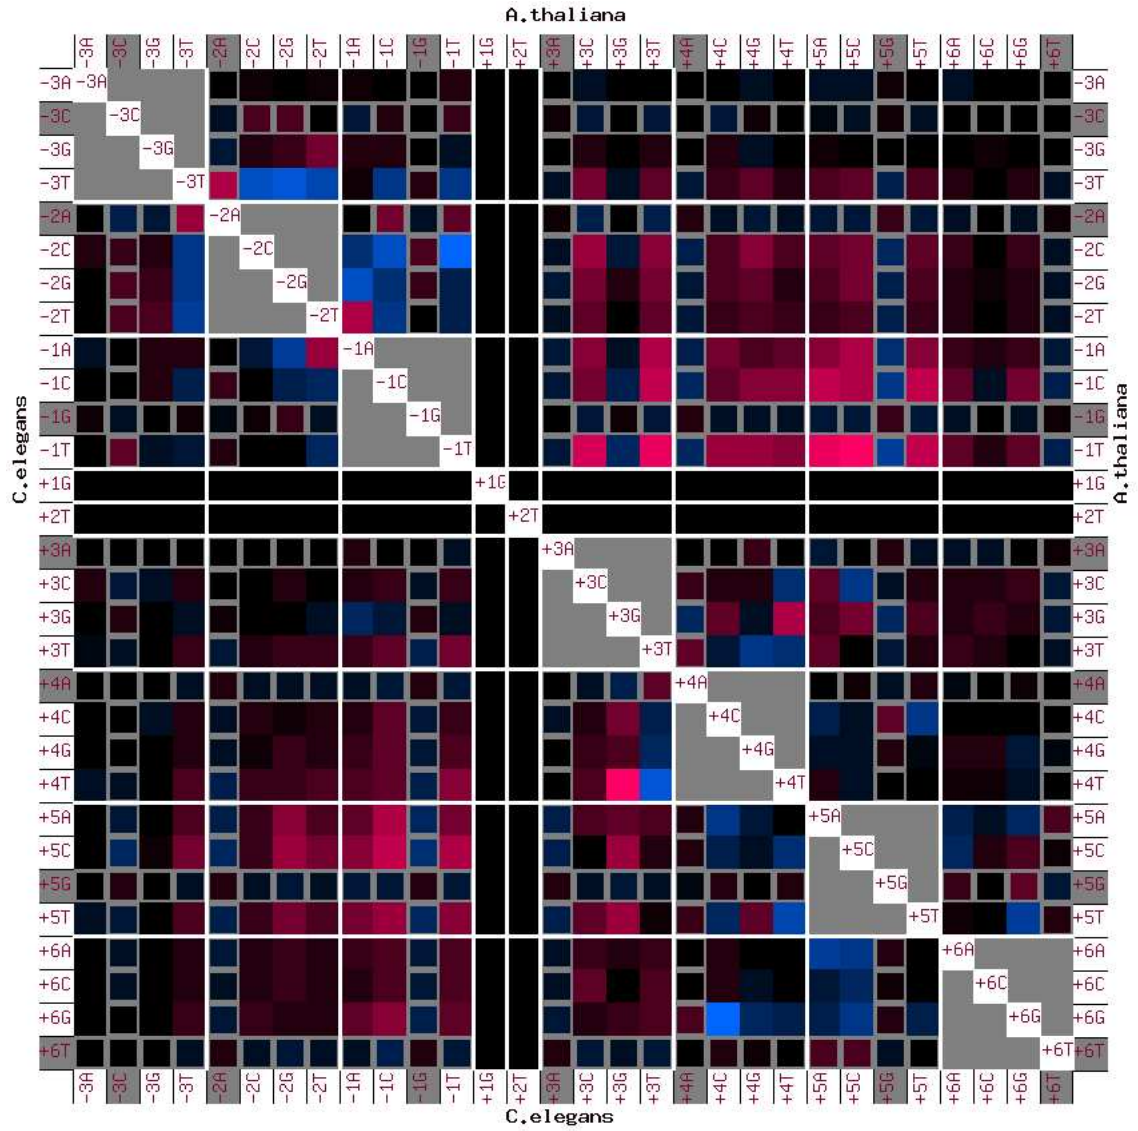

**Supplementary Figure 1** The correlation matrix for *A. thaliana* (upper triangle) and *C. elegans* (lower triangle). The explanation for this figure is provided in the caption for Figure 1.
