# Supplementary material for: Features of 5′-splice-site efficiency derived from disease-causing mutations and comparative genomics
Source: HighWire-hosted journal article supplement (doi:10.1101/gr.6859308), 2007-11-21
Supplement: suppl_2.pdf [file suppl_2.pdf]

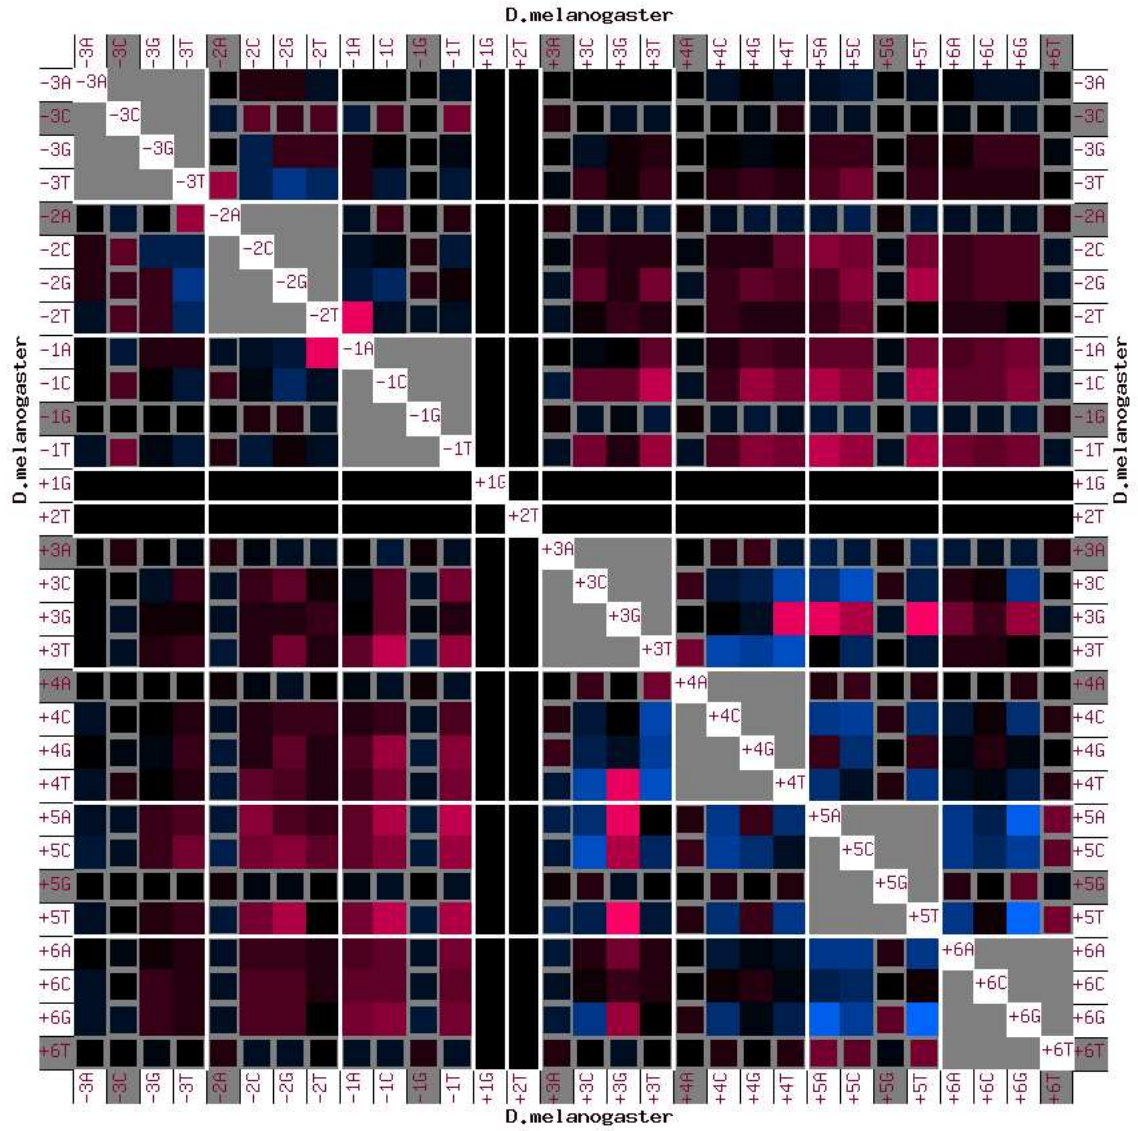

**Supplementary Figure 2** The correlation matrix for *D. melanogaster* (both upper and lower triangles). The explanation for this figure is provided in the caption for Figure 1.
